# Supplementary material for: VAPYRIN Marks an Endosomal Trafficking Compartment Involved in Arbuscular Mycorrhizal Symbiosis
Source: PubMed Central journal article supplement (PMC6558636; doi:10.3389/fpls.2019.00666), 2019-06-04
Supplement: Data_Sheet_2.pdf [file Data_Sheet_2.pdf]

**Figure S9. Preparation of microsomal membranes and attempted solubilization of VAPYRIN-GFP.**

(a) Western blot with monoclonal anti-GFP antibody using *N. benthamiana* leaves expressing VAPYRIN-GFP. After removal of crude cellular debris, the supernatant (input) was ultracentrifuged to yield microsomal membranes (MEM) and soluble supernatant (SP). the MEM fraction was then treated with 1% NP-40 in order to solubilize VAPYRIN-GFP, but it remained entirely associated with the MEM fraction.

(b) Same procedure as in (a), but with leaves expressing ER-localized GFP-HDEL.

(c) Same procedure as in (a), but with leaves expressing free cytoplasmic GFP.

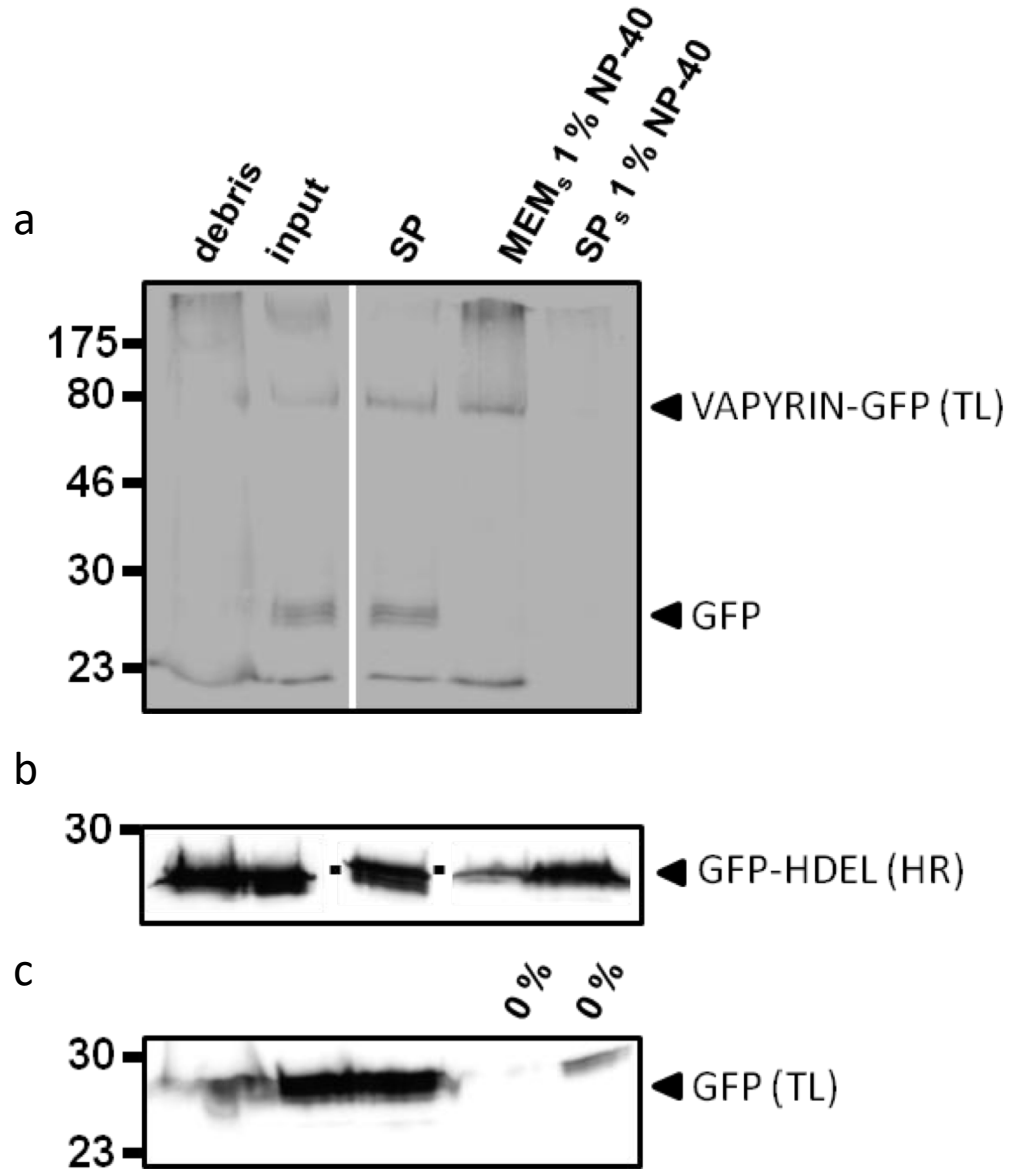

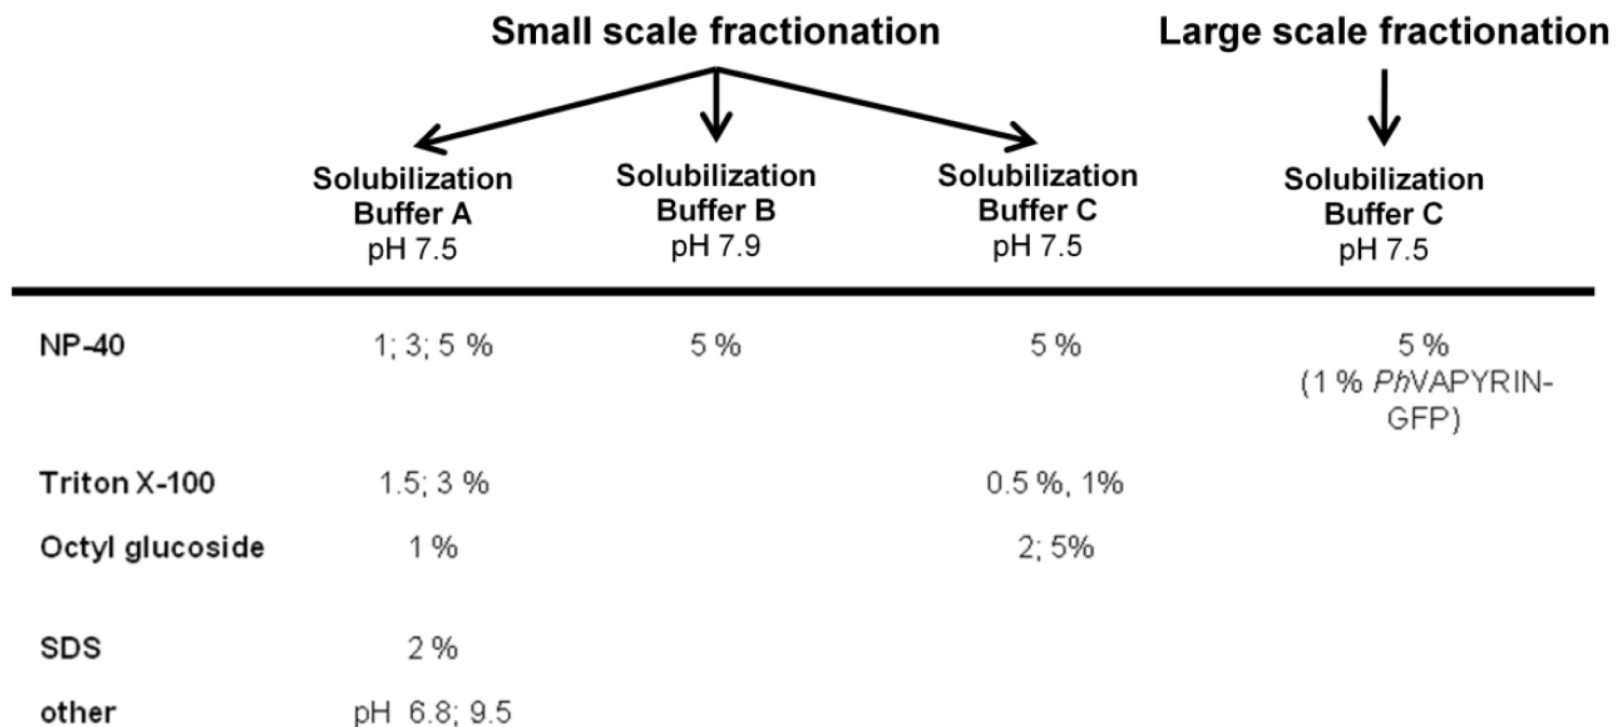

**Figure S10. Experimental conditions in tissue fractionation for the extraction and solubilization of VAPYRIN-GFP and VAP-GFP.** Transgenic hairy roots of *P. hybrida* were used to extract membrane pellets with a large scale and a small scale protocol (see Materials and Methods). Subsequently, the membranes were resuspended in different buffers containing various concentrations of different detergents as indicated.

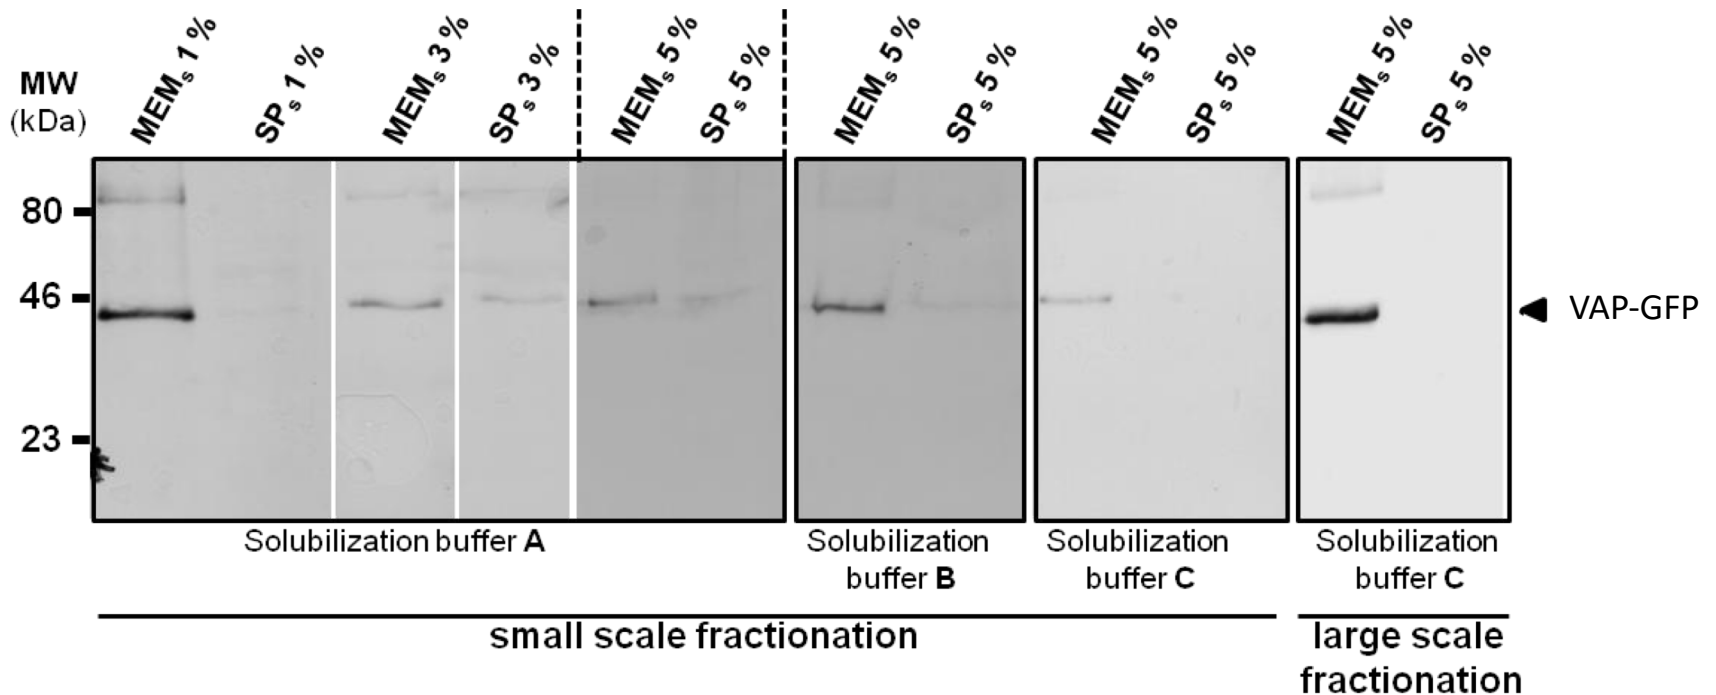

**Figure S11. Attempted solubilization of VAP-GFP with NP-40.**

Microsomal membrane fractions prepared from hairy roots expressing VAP-GFP were resuspended in different buffers with various concentrations of NP-40 as indicated. After incubation for 1h at 4°C, the membrane pellets (MEM) were recovered by centrifugation and subjected to Western blot analysis next to the respective soluble fraction (SP; supernatant after detergent treatment). In all cases, most of the VAP-GFP remained associated with the membranes.

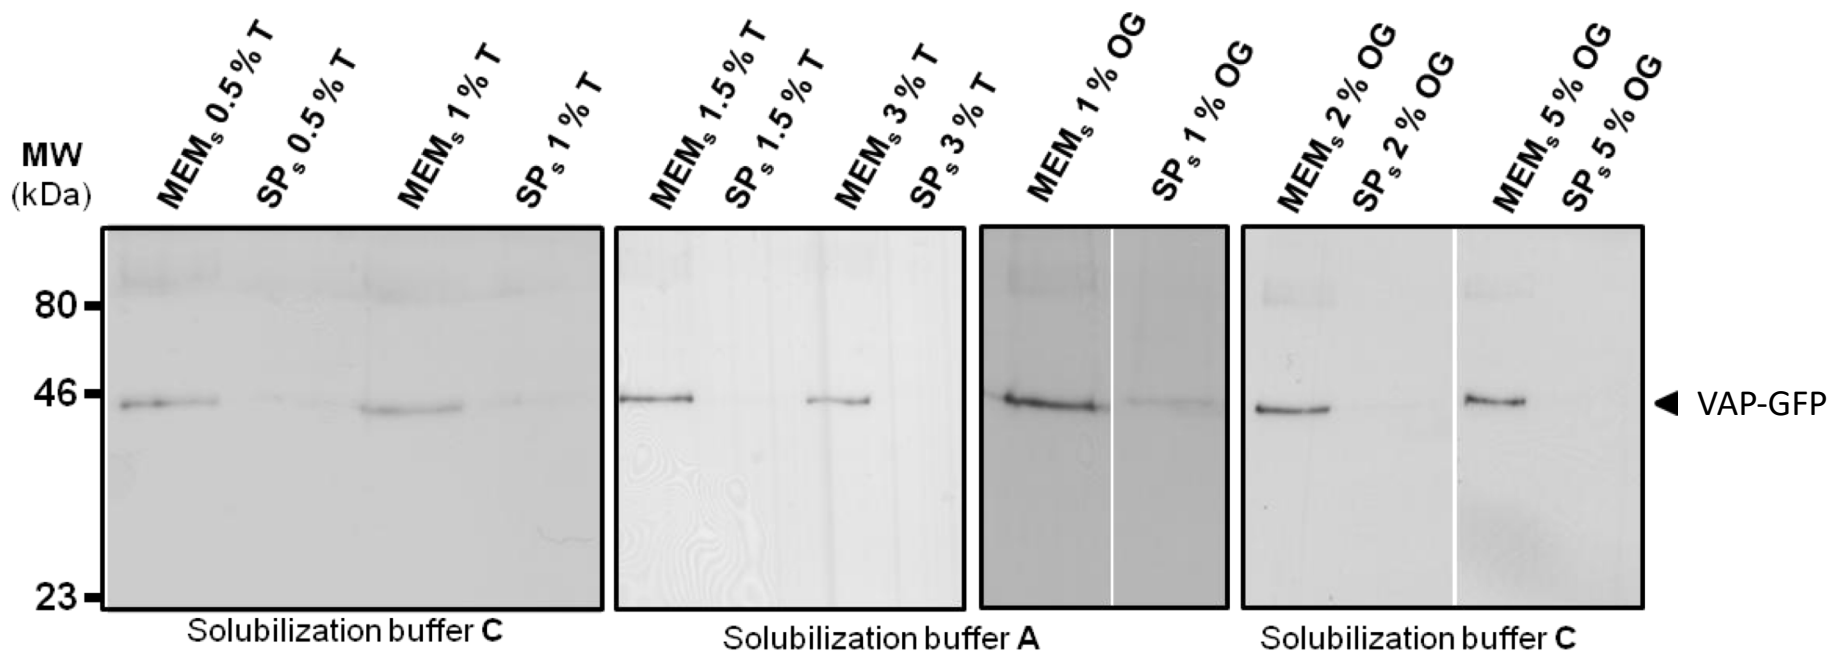

**Figure S12. Attempted solubilization of VAP-GFP with Triton-X-100 and octylglucoside.**

Microsomal membrane fractions prepared from hairy roots expressing VAP-GFP were resuspended in different buffers with various concentrations of Triton-X-100 (T), or octylglucoside (OG) as indicated. After incubation for 1h at 4° C, the membrane pellets (MEM) were recovered by centrifugation and subjected to Western blot analysis next to the respective soluble fraction (SP; supernatant after detergent treatment). In all cases, most of the VAP-GFP remained associated with the membranes.

| Medium | Bait      |          | Prey   |
|--------|-----------|----------|--------|
|        | pDHB1-VAP | pDHB1-EV |        |
| SD-2D  |           |          | B4 I   |
| SD-4D  |           |          | +      |
| SD-2D  |           |          | B7 I   |
| SD-4D  |           |          | ~      |
| SD-2D  |           |          | I24I   |
| SD-4D  |           |          | +      |
| SD-2D  |           |          | I27 II |
| SD-4D  |           |          | +      |
| SD-2D  |           |          | J1 I   |
| SD-4D  |           |          | +      |
| SD-2D  |           |          | J6 I   |
| SD-4D  |           |          | ~      |
| SD-2D  |           |          | J8 V   |
| SD-4D  |           |          | ~      |
| SD-2D  |           |          | J9I    |
| SD-4D  |           |          | ~      |
| SD-2D  |           |          | J17 I  |
| SD-4D  |           |          | ~      |
| SD-2D  |           |          | J20 II |
| SD-4D  |           |          | +      |
| SD-2D  |           |          | J21 I  |
| SD-4D  |           |          | +      |
| SD-2D  |           |          | J24 I  |
| SD-4D  |           |          | +      |

|       |  |  |       |
|-------|--|--|-------|
| SD-2D |  |  | J25 I |
| SD-4D |  |  | +     |
| SD-2D |  |  | J29 I |
| SD-4D |  |  | ~     |
| SD-2D |  |  | K7 I  |
| SD-4D |  |  | +     |
| SD-2D |  |  | K9 I  |
| SD-4D |  |  | ~     |
| SD-2D |  |  | L2 I  |
| SD-4D |  |  | +     |
| SD-2D |  |  | L4 I  |
| SD-4D |  |  | +     |
| SD-2D |  |  | L11 I |
| SD-4D |  |  | ~     |
| SD-2D |  |  | M2 I  |
| SD-4D |  |  | ~     |
| SD-2D |  |  | M4 I  |
| SD-4D |  |  | +     |
| SD-2D |  |  | M22 I |
| SD-4D |  |  | +     |
| SD-2D |  |  | M24 I |
| SD-4D |  |  | ~     |

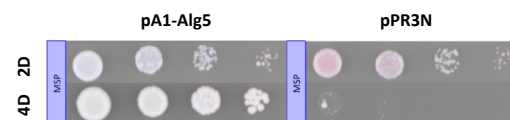

**Figure S13. Drop test with interactor candidates from split-ubiquitin screen.** Interaction between the bait and the respective candidates is revealed by the white color and the better growth on selective medium (SD-4D) with the bait (pDHB1-VAP), relative to the empty vector control (pDHB1-EV). Growth on non-selective medium (SD-2D) is independent of an interaction and just reflects the presence of the bait and prey vectors. Highly specific interactors are signified by a + sign, moderately specific interactors are indicated with a ~ sign. A positive control is provided by pA1-Alg5 vs. pPR3N.

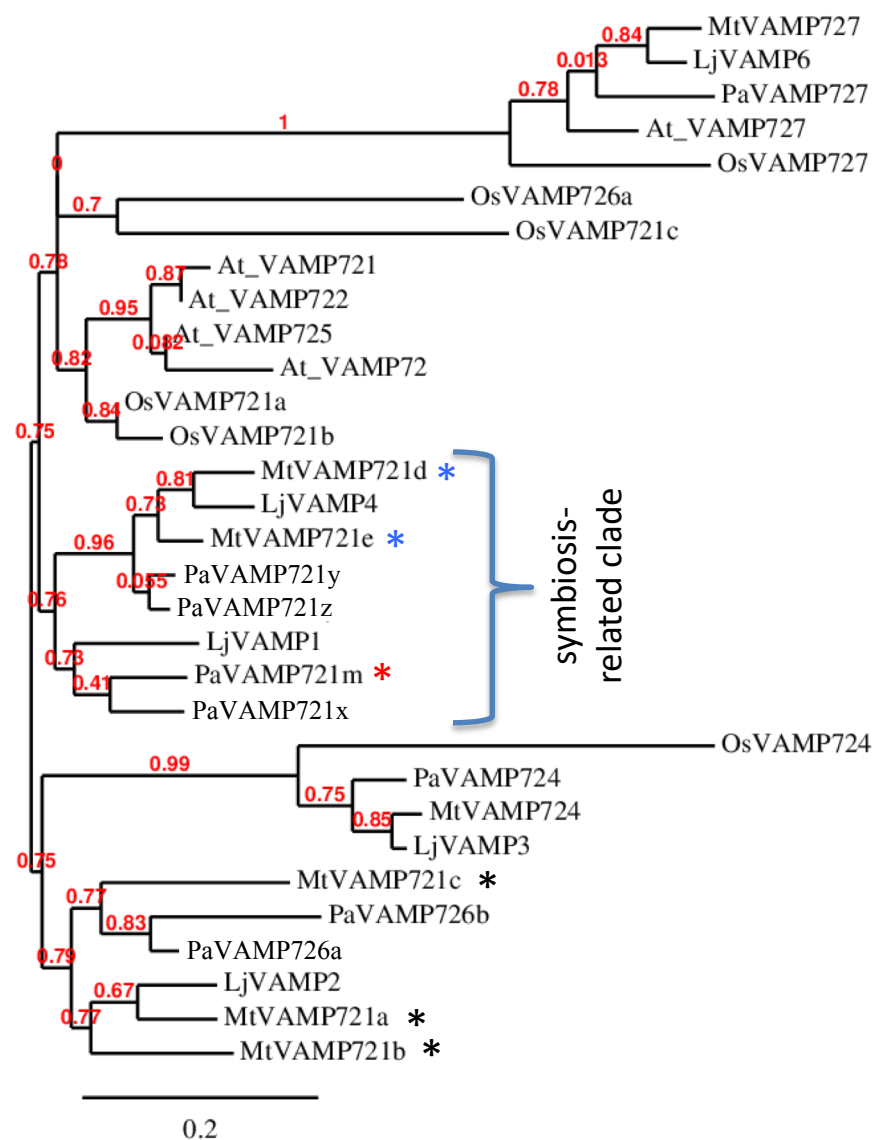

**Figure S14. Phylogenetic analysis of petunia VAMP721.**

The petunia VAMP721m (red asterisk) in this study was compared with all related VAMPs from *Petunia axillaris* (Pa), *Medicago truncatula* (Mt), *Lotus japonicus* (Lj), *Oryza sativa* (Os), and *Arabidopsis thaliana* (At). Symbiosis-related (blue asterisks), and non-symbiotic (black asterisks) VAMP721 members from *M. truncatula* are indicated.

**Table S1. List of subcellular fluorescent makers employed in this study**

| <b>Protein Name</b>      | <b>Wave No.</b> | <b>Assignment localization</b>         | <b>Interaction with Vapyrin bodies</b> | <b>Source/Reference</b>                                          |
|--------------------------|-----------------|----------------------------------------|----------------------------------------|------------------------------------------------------------------|
| <b>Rab C1</b>            | 3R              | Post-Golgi/endosomal                   | Colocalization                         | Geldner <i>et al.</i> , 2009                                     |
| <b>Rab A5d</b>           | 24R             | Endosomal/recycling endosome           | Colocalization and association         | Geldner <i>et al.</i> , 2009                                     |
| <b>Rab D2b</b>           | 33R             | Golgi/endosomal                        | Colocalization and association         | Geldner <i>et al.</i> , 2009                                     |
| <b>Rab A1g</b>           | 129R            | Endosomal/recycling endosome           | No interaction                         | Geldner <i>et al.</i> , 2009                                     |
| <b>Rab G3c</b>           | 11R             | Late endosome/vacuole                  | No interaction                         | Geldner <i>et al.</i> , 2009                                     |
| <b>RabF2b (ARA7)</b>     | 2R              | Late endosome/pre-vacuolar compartment | No interaction                         | Geldner <i>et al.</i> , 2009                                     |
| <b>RabF2a (Rha1)</b>     | 7R              | Late endosome/pre-vacuolar compartment | No interaction                         | Geldner <i>et al.</i> , 2009                                     |
| <b>gamma-TIP</b>         |                 | tonoplast                              | No interaction                         | Hunter <i>et al.</i> , 2007                                      |
| <b>delta-TIP</b>         |                 | tonoplast                              | No interaction                         | Hunter <i>et al.</i> , 2007                                      |
| <b>MEMB12</b>            | 127R            | Golgi                                  | Association                            | Geldner <i>et al.</i> , 2009                                     |
| <b>VAMP721</b>           |                 | Early endosome                         | Colocalization                         | This study                                                       |
| <b>SYP61</b>             |                 | Trans-Golgi network                    | Colocalization                         | (Drakakaki <i>et al.</i> , 2012;<br>Hachez <i>et al.</i> , 2014) |
| <b>AtG8a</b>             |                 | Autophagosomes                         | No interaction                         | (Zhuang <i>et al.</i> , 2017)                                    |
| <b>PIP1;4</b>            | 138R            | Plasma membrane                        | No interaction                         | Geldner <i>et al.</i> , 2009                                     |
| <b>pIVD145-eqFP611</b>   |                 | Mitochondria                           | No interaction                         | (Forner and Binder, 2007)                                        |
| <b>GFP(S65T)-APX(36)</b> |                 | Peroxisomes                            | No interaction                         | (Forner and Binder, 2007)                                        |
| <b>GFP-HDEL</b>          |                 | ER                                     | Association                            | VIB, Belgium                                                     |

**Table S2. Statistical analysis of quantitative co-localization analysis.**

|            | VAPYRIN-     |              |              |              |              |        |              |              |              |              |              |  |
|------------|--------------|--------------|--------------|--------------|--------------|--------|--------------|--------------|--------------|--------------|--------------|--|
|            | ANK-GFP      | VAP-GFP      | RFP          | RabD2b       | RabC1        | RabA5d | SYP61        | MEMB12       | RabA1g       | RabF2a       | eqFP611      |  |
| ANK domain | 1.000        | 1.000        | 1.000        | 1.000        | 1.000        | 1.000  | <b>0.011</b> | <b>0.000</b> | <b>0.000</b> | <b>0.000</b> | <b>0.000</b> |  |
| VAP domain | 1.000        | 1.000        | 1.000        | 1.000        | 1.000        | 1.000  | 0.144        | <b>0.000</b> | <b>0.000</b> | <b>0.000</b> | <b>0.000</b> |  |
| VAPYRIN    | 1.000        | 1.000        | 1.000        | 1.000        | 1.000        | 1.000  | 0.388        | <b>0.001</b> | <b>0.000</b> | <b>0.001</b> | <b>0.000</b> |  |
| RabD2b     | 1.000        | 1.000        | 1.000        | 1.000        | 1.000        | 1.000  | 0.569        | <b>0.001</b> | <b>0.000</b> | <b>0.001</b> | <b>0.000</b> |  |
| RabC1      | 1.000        | 1.000        | 1.000        | 1.000        | 1.000        | 1.000  | 0.992        | 0.098        | 0.054        | <b>0.089</b> | <b>0.019</b> |  |
| RabA5d     | 1.000        | 1.000        | 1.000        | 1.000        | 1.000        | 1.000  | 1.000        | 0.468        | 0.331        | 0.448        | 0.206        |  |
| SYP61      | <b>0.011</b> | 0.144        | 0.388        | 0.569        | 0.992        | 1.000  | 1.000        | 0.953        | 0.821        | 0.898        | 0.412        |  |
| MEMB12     | <b>0.000</b> | <b>0.000</b> | <b>0.001</b> | <b>0.001</b> | 0.098        | 0.468  | 0.953        | 1.000        | 1.000        | 1.000        | 1.000        |  |
| RabA1g     | <b>0.000</b> | <b>0.000</b> | <b>0.000</b> | <b>0.000</b> | 0.054        | 0.331  | 0.821        | 1.000        | 1.000        | 1.000        | 1.000        |  |
| RabF2a     | <b>0.000</b> | <b>0.000</b> | <b>0.001</b> | <b>0.001</b> | 0.089        | 0.448  | 0.898        | 1.000        | 1.000        | 1.000        | 1.000        |  |
| eqFP611    | <b>0.000</b> | <b>0.000</b> | <b>0.000</b> | <b>0.000</b> | <b>0.019</b> | 0.206  | 0.412        | 1.000        | 1.000        | 1.000        | 1.000        |  |

Tukey HSD post-hoc test was performed to test for the degree of co-localization. Based on p-values, Two clear groups emerged:

Group A: ANK-GFP, VAP-GFP, VAPYRIN-RFP, RabD2b, RabC1, and RabA5d

Group B: MEMB12, RabA1g, RabF2a, and eqFP611

SYP61 takes an intermediate position.



**Table S3. List of interactor candidates identified by the split-ubiquitin screen**

| <b>ID</b>     | <b>Assigned function</b>    | <b>protein length</b> | <b>% of protein covered</b> | <b>Signal peptide</b> | <b>Predicted localisation</b> | <b>TM domain</b> |
|---------------|-----------------------------|-----------------------|-----------------------------|-----------------------|-------------------------------|------------------|
| <b>B4 I</b>   | Nitrilase                   | 281                   | 98%                         | –                     | mitochondrial matrix          | –                |
| <b>B7 I</b>   | TA20, anther-related        | 73                    | 73%                         | pos. 28               | vacuole                       | –                |
| <b>I24 I</b>  | Unknown (NAM-like?)         | 166                   | 17%                         | ?                     | ER membrane                   | 1                |
| <b>I27II</b>  | PIP aquaporin               | 283                   | 98%                         | –                     | plasma membrane               | 6                |
| <b>J1I</b>    | Copper-binding-like domain  | 108                   | 54%                         | –                     | membrane                      | 1                |
| <b>J6I</b>    | LAT52                       | 166                   | 94%                         | pos. 20               | extracellular                 | –                |
| <b>J8V</b>    | Microsomal signal peptidase | 189                   | 98%                         | –                     | plasma membrane               | 2                |
| <b>J9I</b>    | PIP aquaporin               | 283                   | 84%                         | –                     | plasma membrane               | 5                |
| <b>J17 I</b>  | VAMP (R-SNARE)              | 103                   | 46%                         | ?                     | ER membrane                   | 1                |
| <b>J20 II</b> | Vacuolar proton ATPase      | 164                   | 100%                        | uncleavable           | vacuolar membrane             | 4                |
| <b>J21 I</b>  | Microsomal signal peptidase | 189                   | 98%                         | –                     | plasma membrane               | 2                |
| <b>J24 I</b>  | Bacterial sequence          | 176                   | 22%                         | ?                     | –                             | 1                |
| <b>J25 I</b>  | Hexa-ubiquitin              | 376                   | 87%                         | –                     | cytoplasm                     | –                |
| <b>J29 I</b>  | Unknown                     | 291                   | 100%                        | pos 29                | Extracellular                 | –                |
| <b>K7 I</b>   | GLP, rhicadhesin receptor   | 222                   | 99%                         | pos. 22               | cell wall                     | –                |
| <b>K9 I</b>   | Lesion-inducing protein     | 157                   | 100%                        | pos. 22               | plasma membrane               | 2 or 3           |
| <b>L2 I</b>   | TIP aquaporin               | 246                   | 99%                         | pos. 39               | plasma membrane               | 6                |
| <b>L4 I</b>   | Unknown (RING-domain)       | 218                   | 92%                         | –                     | ER membrane                   | 3                |
| <b>L11 I</b>  | LAT52                       | 166                   | 94%                         | pos. 20               | extracellular                 | –                |
| <b>M2 I</b>   | Peptidase inhibitor         | 93                    | 100%                        | –                     | cytoplasm                     | –                |
| <b>M4 I</b>   | PIP aquaporin               | 287                   | 100%                        | –                     | plasma membrane               | 6                |
| <b>M22 I</b>  | Sucrase /ferredoxin-like    | 287                   | 77%                         | –                     | cytoplasm                     | –                |
| <b>M24 I</b>  | VAMP-like SEC22 (R-SNARE)   | 62                    | 27%                         | ?                     | ER membrane                   | 1                |

**Table S4. RNAseq data for 12 VAMP genes of *P. hybrida* in mycorrhizal roots vs. control roots**

| Feature ID               |          | RPKM values |      |      |             |      |      |      |             |      | p-value*    | M/c** |
|--------------------------|----------|-------------|------|------|-------------|------|------|------|-------------|------|-------------|-------|
|                          |          | M1          | M2   | M3   | M ave       | c1   | c2   | c3   | c ave       |      |             |       |
| Peaxi162Scf00107g01117.1 | VAMP721m | 384         | 397  | 449  | <b>410</b>  | 545  | 430  | 509  | <b>495</b>  | 0.12 | <b>0.83</b> |       |
| Peaxi162Scf00517g00424.1 | VAMP721x | 792         | 800  | 921  | <b>838</b>  | 741  | 702  | 855  | <b>766</b>  | 0.06 | <b>1.09</b> |       |
| Peaxi162Scf00149g01112.1 | VAMP721y | 1349        | 1465 | 1798 | <b>1537</b> | 1957 | 1865 | 2099 | <b>1974</b> | 0.00 | <b>0.78</b> |       |
| Peaxi162Scf00367g00010.1 | VAMP721z | 895         | 920  | 1028 | <b>948</b>  | 1113 | 1076 | 1161 | <b>1117</b> | 0.00 | <b>0.85</b> |       |
| Peaxi162Scf00047g01029.1 | VAMP726a | 0           | 0    | 0    | <b>0</b>    | 0    | 0    | 0    | <b>0</b>    | 1.00 | <b>n.d.</b> |       |
| Peaxi162Scf00817g00123.1 | VAMP726b | 0           | 0    | 1    | <b>0</b>    | 0    | 0    | 0    | <b>0</b>    | 0.58 | <b>n.d.</b> |       |
| Peaxi162Scf00125g00227.1 | VAMP727  | 627         | 622  | 741  | <b>663</b>  | 613  | 660  | 783  | <b>685</b>  | 1.00 | <b>0.97</b> |       |
| Peaxi162Scf00534g00007.1 | VAMP724  | 115         | 88   | 88   | <b>97</b>   | 113  | 95   | 78   | <b>95</b>   | 1.00 | <b>1.02</b> |       |
| Peaxi162Scf00643g00112.1 | VAMP713  | 532         | 551  | 648  | <b>577</b>  | 623  | 737  | 886  | <b>749</b>  | 0.11 | <b>0.77</b> |       |
| Peaxi162Scf00136g00229.1 | VAMP711  | 309         | 323  | 379  | <b>337</b>  | 336  | 399  | 476  | <b>404</b>  | 0.38 | <b>0.83</b> |       |
| Peaxi162Scf00091g00616.1 | VAMP714a | 276         | 323  | 366  | <b>322</b>  | 315  | 276  | 359  | <b>317</b>  | 0.82 | <b>1.02</b> |       |
| Peaxi162Scf00091g00617.1 | VAMP714b | 178         | 215  | 230  | <b>208</b>  | 210  | 181  | 226  | <b>206</b>  | 0.85 | <b>1.01</b> |       |

\*Baggerley's test: M vs. c original values - FDR p-value correction

\*\*Induction ratio mycorrhizal/control
